# Supplementary material for: Preparation of graphene–hafnium oxide composite for selective enrichment and analysis of phosphopeptides
Source: Royal Society of Chemistry journal article supplement (doi:10.1039/c5ra17471f), 2015-01-01
Supplement: c5ra17471f1.pdf [file c5ra17471f1.pdf]

Table S1. The phosphopeptides from  $\alpha$ -casein,  $\beta$ -casein and milk tryptic digests were identified by MALDI-TOF mass analysis.

| Peak Label       | Number of phosphorylation | [M+H] <sup>+</sup> | Peptide sequence                                                               | Type of material used |
|------------------|---------------------------|--------------------|--------------------------------------------------------------------------------|-----------------------|
| $\alpha$ -casein |                           |                    |                                                                                |                       |
| $\alpha$ 1       | 1                         | 1237.4             | TVDMEST <u>E</u> TVF                                                           | (1)(3)                |
| $\alpha$ 2       | 1                         | 1253.5             | TVDM <sup>o</sup> EST <u>E</u> TVF                                             |                       |
| $\alpha$ 3       | 1                         | 1466.6             | TVDMEST <u>E</u> TVFTK                                                         | (1)(2)(3)             |
| $\alpha$ 4       | 1                         | 1482.6             | TVDM <sup>o</sup> EST <u>E</u> TVFTK                                           | (1)(2)(3)             |
| $\alpha$ 5       | 2                         | 1539.7             | EQL <u>S</u> TSEEN <u>S</u> KK                                                 | (1)(2)(3)             |
| $\alpha$ 6       | 1                         | 1660.8             | VPQLEIVP <u>N</u> SAEER                                                        | (1)(2)(3)             |
| $\alpha$ 7       | 1                         | 1833.8             | YLGEYLIVP <u>N</u> SAEER                                                       | (1)(2)(3)             |
| $\alpha$ 8       | 1                         | 1847.6             | DIGSE <u>S</u> T <u>E</u> DQAMEDIK                                             | (1)(2)(3)             |
| $\alpha$ 9       | 2                         | 1927.7             | DIG <u>S</u> E <u>S</u> T <u>E</u> DQAMEDIK                                    | (1)(2)(3)             |
| $\alpha$ 10      | 2                         | 1943.7             | DIG <u>S</u> E <u>S</u> T <u>E</u> DQAM <sup>o</sup> EDIK                      | (1)(2)(3)             |
| $\alpha$ 11      | 1                         | 1952.0             | YKVPQLEIVP <u>N</u> SAEER                                                      | (1)(2)(3)             |
| $\alpha$ 12      | 1                         | 2080.0             | KYKVPQLEIVP <u>N</u> SAEER                                                     |                       |
| $\alpha$ 13      | 4                         | 2619.0             | NTMEHV <u>S</u> <u>S</u> <u>S</u> SE <u>S</u> I <u>S</u> QETYK                 | (1)(2)(3)             |
| $\alpha$ 14      | 4                         | 2635.8             | NTM <sup>o</sup> EHV <u>S</u> <u>S</u> <u>S</u> SE <u>S</u> I <u>S</u> QETYK   |                       |
| $\alpha$ 15      | 3                         | 2678.0             | VNEL <u>S</u> KDIG <u>S</u> E <u>S</u> T <u>E</u> DQAMEDIK                     |                       |
| $\alpha$ 16      | 3                         | 2695.0             | VNEL <u>S</u> KDIG <u>S</u> E <u>S</u> T <u>E</u> DQAM <sup>o</sup> EDIK       |                       |
| $\alpha$ 17      | 5                         | 2703.5             | Q*MEAE <u>S</u> I <u>S</u> <u>S</u> SE <u>S</u> EIVP <u>N</u> S <u>V</u> EQK   | (1)(2)(3)             |
| $\alpha$ 18      | 5                         | 2720.9             | QMEAE <u>S</u> I <u>S</u> <u>S</u> SE <u>S</u> EIVP <u>N</u> S <u>V</u> EQK    | (1)(2)(3)             |
| $\alpha$ 19      | 4                         | 2747.1             | NTMEHV <u>S</u> <u>S</u> <u>S</u> SE <u>S</u> I <u>S</u> QETYKQ                | (1)(2)(3)             |
| $\alpha$ 20      | 3                         | 2935.1             | EKVNEL <u>S</u> KDIG <u>S</u> E <u>S</u> T <u>E</u> DQAMEDIK                   | (1)                   |
| $\alpha$ 21      | 4                         | 3008.0             | NANEE <u>E</u> Y <u>S</u> I <u>S</u> <u>S</u> SE <u>S</u> E <u>S</u> AEVATEEVK | (1)(2)(3)             |
| $\alpha$ 22      | 5                         | 3088.0             | NANEE <u>E</u> Y <u>S</u> I <u>S</u> <u>S</u> SE <u>S</u> E <u>S</u> AEVATEEVK | (1)(3)                |
| $\beta$ -casein  |                           |                    |                                                                                |                       |
| $\beta$ 1        | 1                         | 2061.8             | FQ <u>S</u> EEQQQTEDELQDK                                                      | (1)(2)(3)             |
| $\beta$ 2        | 4                         | 2353.8             | NVPGEIV <u>S</u> LS <u>S</u> SE <u>S</u> ITR                                   | (1)                   |
| $\beta$ 3        | 1                         | 2432.0             | IEKFQ <u>S</u> EEQQQTEDELQDK                                                   |                       |
| $\beta$ 4        | 1                         | 2556.1             | FQ <u>S</u> EEQQQTEDELQDKIHPF                                                  | (1)(2)(3)             |
| $\beta$ 5        | 4                         | 3122.3             | RELEELNVPGEIV <u>S</u> LS <u>S</u> SE <u>S</u> ITR                             | (1)(2)(3)             |

S: Phosphorylated site; M<sup>o</sup>: oxidation on methionine;

Tryptic digests of non-fat milk was captured by (1) GHOC; (2) GTOC; (3) GZOC.

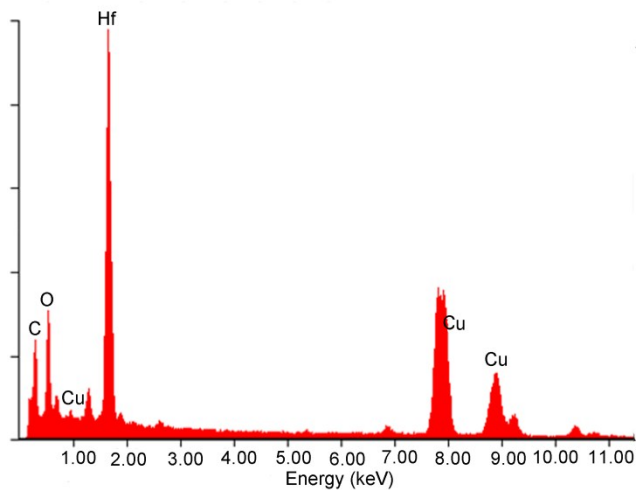

Fig. S1 Energy-dispersive X-ray analysis (EDXA) image of the GHOC.

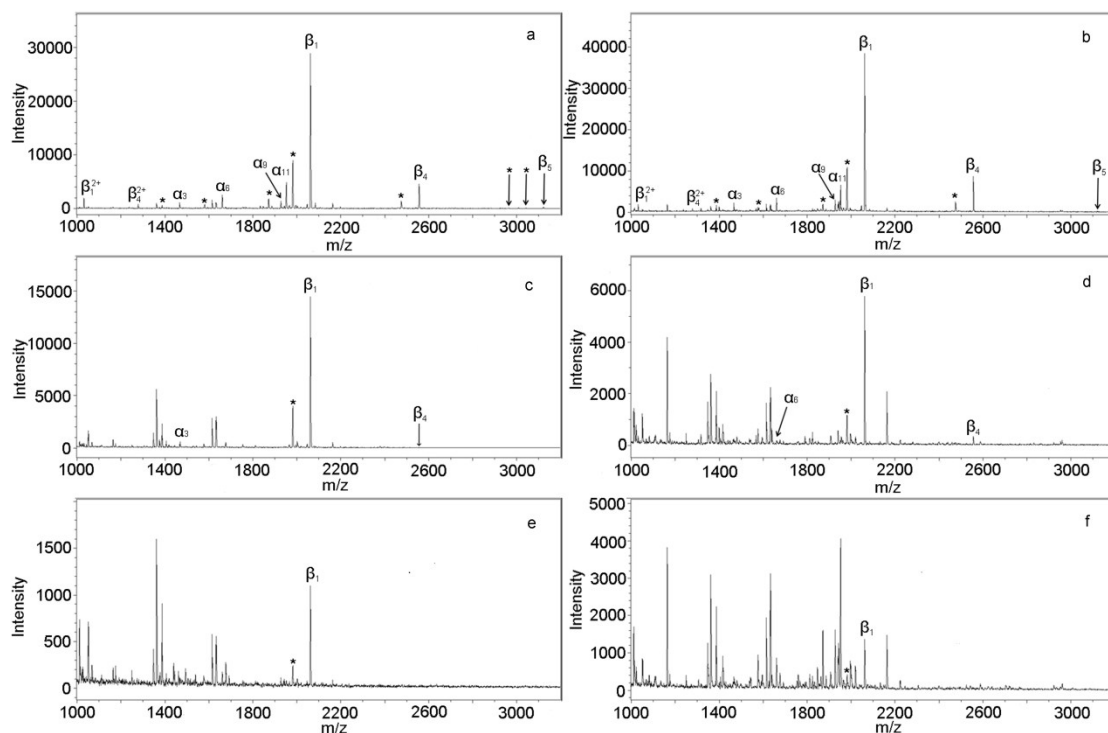

Fig. S2 MALDI-TOF mass spectra of the peptides from the mixtures of BSA and  $\beta$ -casein at a molar ratio of 1 : 10 enriched with (a) GTOC, (b) GZOC; the 1 : 100 mixtures enriched with (c) GTOC, (d) GZOC; The 1 : 1000 mixtures enriched with (e) GTOC, (f) GZOC. The metastable losses of phosphoric acid are labeled with \*.
